# Supplementary material
Source: Springer Nature journal article supplement (https://www.springermedizin.de/resource/supplementary/10194_2014_1015_MOESM3_ESM.docx/9423376)
Supplement: MOESM3 [file 9423376]

**Figure 1.**

**Mean values for the Gaps-in-noise test in right (RE) and left (LE) ears in all groups.**
